1 **A window into lysogeny:**  
2 **Revealing temperate phage biology with transcriptomics**

3  
4 Siân V. Owen<sup>1,2</sup>, Rocío Canals<sup>2</sup>, Nicolas Wenner<sup>2</sup>, Disa L. Hammarlöf<sup>2,3</sup>, Carsten  
5 Kröger<sup>2,4</sup> and Jay C. D. Hinton<sup>2</sup>

6  
7 <sup>1</sup> Department of Biomedical Informatics, Harvard Medical School, Boston, USA

8 <sup>2</sup> Institute of Integrative Biology, University of Liverpool, UK

9 <sup>3</sup> Science for Life Laboratory, KTH, Stockholm, Sweden

10 <sup>4</sup> Department of Microbiology, School of Genetics and Microbiology, Moyne Institute of  
11 Preventive Medicine, Trinity College Dublin, Dublin 2, Ireland

12

13 **KEYWORDS**

14 Bacteriophage Transcriptomics RNA-seq Lysogeny Prophage

15 **ABSTRACT**

16 Integrated phage elements, known as prophages, are a pervasive feature of bacterial  
17 genomes. Prophages can enhance the fitness of their bacterial hosts by conferring  
18 beneficial functions, such as virulence, stress tolerance or phage resistance, which are  
19 encoded by accessory loci. Whilst the majority of phage-encoded genes are repressed  
20 during lysogeny, accessory loci are often highly expressed. However, novel prophage  
21 accessory loci are challenging to identify based on DNA sequence data alone. Here, we  
22 use bacterial RNA-seq data to examine the transcriptional landscapes of five  
23 *Salmonella* prophages. We show that transcriptomic data can be used to heuristically  
24 enrich for prophage features that are highly expressed within bacterial cells and often  
25 represent functionally-important accessory loci. Using this approach we identify a novel  
26 anti-sense RNA species in prophage BTP1, STnc6030, which mediates superinfection  
27 exclusion of phage BTP1 and immunity to closely-related phages. Bacterial  
28 transcriptomic datasets are a powerful tool to explore the molecular biology of  
29 temperate phages.

## 30 INTRODUCTION

31

32 Temperate bacteriophages can incorporate their chromosomes into the genome of host  
33 bacteria (lysogeny), and persist as vertically replicated genomic elements known as  
34 prophages. The majority of the temperate phage genome encodes proteins dedicated to  
35 virion production and host cell lysis, functions that are toxic to bacterial cells. To exist  
36 stably as passive genomic elements, the expression of the majority of prophage genes  
37 must be repressed at the transcriptional level. Only those functions necessary to  
38 maintain and favour lysogeny are expressed. The molecular mechanisms governing  
39 prophage gene regulation are best understood in the archetypical *Escherichia coli*  
40 phage lambda, in which the synthesis of a single protein, the CI repressor, is sufficient  
41 to maintain the lysogenic state of the prophage (Ptashne, 2004). Molecular studies  
42 investigating the gene expression of phage lambda lysogens showed that four  
43 additional lambda genes are expressed from the integrated prophage genome during  
44 lysogenic growth: the *rexAB* operon, encoding a superinfection immunity system; and  
45 the *lom* and *bor* genes, which encode virulence factors (Barondess and Beckwith, 1995;  
46 Chen et al., 2005; Liu et al., 2013; Osterhout et al., 2007; Vica Pacheco et al., 1997).  
47 The expression of fitness-associated prophage-encoded genes during lysogeny  
48 represents a mutualism whereby enhancing the fitness of the bacterial host directly  
49 increases the fitness (as measured by genome replication) of the integrated prophage  
50 (Cumby et al., 2012). Such genes, known as accessory or moron loci (Juhala et al.,  
51 2000), with diverse functions such as virulence, stress resistance and phage resistance  
52 have been found in characterised bacterial prophages (Casjens and Hendrix, 2015;  
53 Cumby et al., 2012; Veses-Garcia et al., 2015). Importantly, prophage accessory loci  
54 are not required for any part of the phage life cycle, and only affect the biology of the  
55 host bacterium during lysogeny, a process known as lysogenic conversion. In  
56 *Salmonella enterica* serovar Typhimurium (*S. Typhimurium*), and many other bacterial  
57 pathogens, prophage-encoded accessory loci are important for virulence in animal  
58 models (Brüssow et al., 2004; Figueroa-Bossi and Bossi, 1999; Fortier and Sekulovic,  
59 2013; Wahl et al., 2019).

60

61 The majority of bacterial taxa contain prophages (Roux et al., 2015; Touchon et al.,  
62 2016), and prophages are very frequently the main sources of genetic diversity between  
63 closely-related bacterial strains or pathovariants (Ashton et al., 2017; Mottawea et al.,  
64 2018). Given that more genome sequences exist for bacteria than for any other domain  
65 of life, and bacteria frequently harbour multiple prophages, it has been argued that  
66 temperate phage may be the most deeply sequenced organisms on the planet (Owen et  
67 al., 2018). Prophages therefore represent a vast and largely unexplored reservoir of  
68 functionally important genes. However, identifying prophage accessory loci in bacterial  
69 genome sequences, particularly in bacterial taxa in which prophages have not been well  
70 characterised, is challenging. The functional gene annotation of prophage regions most  
71 frequently consists of hypothetical proteins, and it is difficult to distinguish hypothetical  
72 proteins that represent novel accessory genes from those that represent divergent  
73 genes involved in the phage lifecycle based on DNA sequence data alone.

74  
75 Here we use transcriptomic data to show that prophage accessory loci typically have  
76 unique transcriptional signatures compared with phage lytic genes, an observation  
77 which can be exploited to heuristically enrich for novel prophage accessory features and  
78 genes involved in the maintenance of lysogeny. Using this approach we discovered that  
79 the uncharacterised STnc6030 anti-sense RNA (asRNA) of *S. Typhimurium* prophage  
80 BTP1 functions as a novel superinfection exclusion factor. Bacterial transcriptomic data  
81 mapped to prophage regions are a powerful tool to discover novel temperate phage  
82 biology simply by identifying the subset of prophage genetic features that are highly  
83 expressed in lysogenic cells.



## 84 **METHODS**

85

### 86 **Transcriptomic analysis of the prophage regions of *S. Typhimurium* D23580**

87 Prophage gene expression during lysogeny was investigated using data from three  
88 previous studies (Canals et al., 2019; Hammarlöf et al., 2018; Kröger et al., 2013). A  
89 description of the experimental conditions associated with the RNA-seq data used in  
90 this analysis is given in Supplementary Table 1. Transcripts per million (TPM) values  
91 were obtained from Canals et al. and represent a normalised expression value per gene  
92 and condition (Canals et al., 2019; Wagner et al., 2013, 2012) . As previously described,  
93 a TPM cut-off score of 10 was used to define gene expression, so that only genes with  
94 a TPM value of >10 were considered to be expressed (Kröger et al., 2013). Heat maps  
95 showing absolute expression were obtained using TPM values and conditional  
96 formatting in Microsoft Excel. Prophage transcriptome maps were generated by  
97 visualisation of sequence reads using the Integrated Genome Browser (IGB) (Nicol et  
98 al., 2009). For display in IGB, the read depth was adjusted in relation to the cDNA  
99 library with the lowest number of reads (Skinner et al., 2009). For identification of  
100 prophage regulatory or accessory genes, a TPM cut-off score of 100 was used to define  
101 high expression, so that only prophage genes with a TPM value of >100 were  
102 considered to be highly expressed and therefore putatively involved in prophage  
103 lysogeny regulation or accessory functions.

104

### 105 **Plasmid construction**

106 All oligonucleotide (primer) sequences used in this study are listed in Supplementary  
107 Table 2, and bacterial strains, phages and plasmids are given in Supplementary Table  
108 3. The plasmid to overexpress the STnc6030 asRNA (pP<sub>L</sub>-STnc6030) was constructed  
109 using the overlap-extension PCR cloning method previously described (Bryksin and  
110 Matsumura, 2010).

111

112 The pJV300 (pP<sub>L</sub>) plasmid (Sittka et al., 2007) was initially modified to encode  
113 gentamicin resistance (pP<sub>L</sub>-Gm) by overlap-extension PCR cloning. For that, chimeric  
114 primers NW\_88 and NW\_89, containing pJV300 plasmid sequence at the 5' end and

115 insert sequence at the 3' end were first used to PCR-amplify the *aacC1* gentamicin  
116 resistance locus from the pME4510 plasmid (Rist and Kertesz, 1998). 30 ng of the  
117 template plasmid were mixed with 150-300 ng of the insert and Q5 buffer, dNTPs, Q5  
118 DNA polymerase (New England Biolabs) and water were added to a final volume of 50  
119  $\mu$ l. PCR reactions were carried out as follows: 98°C, 30 sec; 25x (98°C, 10 sec; 55°C,  
120 30 sec, 72°C, 3 min); 72°C, 5 min. The original plasmid template was then digested  
121 using the restriction enzyme DpnI in Cutsmart buffer (1X) (New England Biolabs),  
122 according to the manufacturer's instructions, and the overlap-extension PCR products  
123 were transformed into chemically competent *E. coli* TOP10 cells (Green and Rogers,  
124 2013). Cells harbouring the new pP<sub>L</sub>-Gm (pJV300 gentamicin resistant derivative)  
125 plasmid were selected by plating on LB agar containing gentamicin (20  $\mu$ g/ml). Overlap-  
126 extension PCR cloning was subsequently used to insert a sequence of interest into the  
127 pP<sub>L</sub>-Gm plasmid downstream of the P<sub>LacO-1</sub> constitutive promoter. The same procedure  
128 previously described was followed, except that the chimeric primers used to amplify the  
129 insert were NW\_295 and NW\_296, and D23580 genomic DNA was used as a template.  
130 These primers targeted the region of the pP<sub>L</sub>-Gm plasmid between the P<sub>LacO-1</sub> promoter  
131 and the *rnmB* transcriptional terminator. To confirm that the plasmid carried the correct  
132 construction after transformation, primers external to the insertion site were used to  
133 Sanger sequence the inserted fragment (GATC).

134

### 135 **Extraction of total bacterial RNA**

136 Bacterial RNA was extracted as previously described (Kröger et al., 2013, 2012). Four  
137 or 5 OD<sub>600</sub> units were removed from bacterial cultures, and cellular transcription was  
138 stopped using 0.4X culture volume of a 5% phenol (pH 4.3) 95% ethanol "stop" solution  
139 (Sigma P4557 and E7023, respectively). Cells were stabilised on ice in stop solution for  
140 at least 30 minutes before being harvested at 7,000 x g for 10 min at 4°C. At this point,  
141 pellets were either stored at -80°C, or RNA was immediately extracted.

142

143 To isolate RNA, pellets were resuspended in 1 ml of TRIzol™ Reagent (Invitrogen).  
144 Four hundred  $\mu$ l of chloroform were added and the samples were immediately and  
145 thoroughly mixed by inversion. Samples were moved to a Phase-lock tube (5 Prime)

146 and the aqueous and organic phases were separated by centrifugation at 13,000 rpm  
147 for 15 minutes at room temperature in a table top centrifuge. The aqueous phase was  
148 transferred into a new 1.5 ml tube and the RNA was precipitated using isopropanol for  
149 30 minutes at room temperature, followed by centrifugation at 21,000 x g for 30 minutes  
150 at room temperature. The RNA pellet was rinsed with 70% ethanol followed by  
151 centrifugation at 21,000 x g rpm for 10 minutes at room temperature. The RNA pellet  
152 was air-dried for 15 minutes and resuspended in DEPC-treated water at 65°C with  
153 shaking at 900 rpm on a Thriller thermoshaker (Peqlab) for 5 minutes with occasional  
154 vortexing. RNA was kept on ice whenever possible and was stored at -80°C. RNA  
155 concentration was measured using a nanodrop ND-1000 spectrophotometer, and RNA  
156 quality was inspected visually using a 2100 Bioanalyser (Agilent).

157

#### 158 **Detection of STnc6030 by Northern Blot**

159 Following extraction, total RNA was separated based on size by electrophoresis through  
160 a denaturing 20 mM guanidine thiocyanate 1.5% agarose gel in TBE 1 X. Generally 1-  
161 10 µg of RNA were mixed with an equal volume of 2X Urea-Blue denaturing buffer  
162 (0.025% xylene cyanol, 0.025% bromophenol blue and 50% urea) and samples were  
163 heat-denatured at 90°C for 5 minutes and chilled on ice before loading. 4 µl of Low  
164 Range ssRNA ladder (NEB) or 5 µl RNA molecular weight marker I DIG-labelled  
165 (Roche) were treated in the same way as the RNA samples to allow the detected  
166 transcript length to be estimated. Samples were run in 1X TBE buffer at a constant  
167 voltage of 120 V for denaturing polyacrylamide gels, or 80 V (at 4°C) for denaturing  
168 agarose gels.

169

170 Separated RNA was transferred from polyacrylamide gels to positively charged nylon  
171 membranes (Roche, cat. 11 209 272 001) using the Trans-Blot SD Semi-Dry  
172 Electrophoretic Transfer Cell (BioRad) at a constant amplitude of 125 mA for 30 minutes  
173 at 4°C. For denaturing agarose gels, separated RNA was transferred to positively  
174 charged nylon membranes using overnight capillary transfer in 20X saline-sodium  
175 citrate (SSC) buffer as described in the DIG Northern Starter Kit manual (Roche, Cat.  
176 12039672910).

177 RNA was UV-crosslinked to the membranes in a CL-1000 UV-crosslinker (UVP) set to  
178 3600 (360,000  $\mu\text{J}/\text{cm}^2$ ). The membrane was equilibrated in hybridisation buffer for 1  
179 hour at 68°C in pre-warmed DIG Easy Hyb solution (Roche) in a rotating hybridisation  
180 oven. 5  $\mu\text{l}$  (approximately 1.25  $\mu\text{g}$ ) of riboprobe were heat denatured in 5 ml of DIG  
181 Easy Hyb solution at 68°C for 30 minutes and added to the membrane for hybridisation  
182 overnight at 68°C in the rotating hybridisation oven. The oligonucleotide sequence used  
183 to generate the DIG labelled riboprobe are given in Supplementary Table 2. Membrane  
184 washing, blocking and transcript detection steps were carried out as described in the  
185 Roche manual. An ImageQuant LAS4000 Imager was used for blot detection.

186

### 187 **Phage enumeration and plaquing**

188 Phage enumeration and plaque isolations were carried out using the double layer agar  
189 technique. To count spontaneously induced phages in overnight cultures, 1 ml of  
190 overnight culture was passed through a 0.22  $\mu\text{m}$  syringe filter. For enumeration, phage  
191 lysates or culture supernatants serial 10-fold dilutions were made in sterile LB broth. For  
192 overnight culture supernatant, dilution up to  $10^{-7}$  was sufficient, whereas for phage  
193 lysates, higher dilutions were required (typically up to  $10^{-10}$ ). 4 ml of 0.4% LB agar were  
194 seeded with 100  $\mu\text{l}$  of an overnight culture of the required indicator strain (approximately  
195  $10^8$  CFU) and, once solidified, phage dilutions were applied to the agar in 10  $\mu\text{l}$  drops.  
196 After drying for 30 mins, plates were incubated overnight at 37°C. Phage concentrations  
197 were calculated as plaque forming units (PFU) per ml of lysate or culture supernatant  
198 (PFU/ml).

199

### 200 **Isolation and sequencing of STnc6030 escape phage**

201 One hundred  $\mu\text{l}$  of 10-fold dilutions of high titre BTP1 stock ( $10^{11}$  PFU/ml) were mixed  
202 with 100  $\mu\text{l}$  of D23580  $\Delta\text{BTP1}$  pP<sub>L</sub>-STnc6030, added to 3 ml of molten LB (Lennox)  
203 0.3% agar and poured onto LB plates. The plates were incubated right-side up  
204 overnight at 37°C for 16 hours. The frequency of occurrence of spontaneous STnc6030  
205 escape mutants was determined as the PFU/ml of escape mutants divided by the input  
206 titre of BTP1 phage. Escape phage plaques were picked and replicated on D23580  
207  $\Delta\text{BTP1}$  pP<sub>L</sub>-STnc6030. To ensure purity, a nested PCR strategy was used to ensure

208 amplification of the STnc6030 region from the escape phages without amplification of  
209 WT STnc6030 from contaminating pP<sub>L</sub>-STnc6030 plasmid DNA. The larger STnc6030  
210 region was first amplified using oligonucleotides NW\_296 and NW\_298, and this  
211 amplicon was used for a more targeted amplification of the STnc6030 region using  
212 oligonucleotides NW\_296 and NW\_295, yielding a 787 bp amplicon that was Sanger  
213 sequenced by GATC Biotech AG (Germany). All amplicons were sequenced with  
214 oligonucleotides NW\_296 and NW\_295 so that the entire length of the STnc6030 region  
215 could be resolved. SNPs were detected by alignment of the Sanger sequencing data  
216 with the STnc6030 sequence from WT *S. Typhimurium* D23580 using SnapGene  
217 software (from GSL Biotech; available at [snapgene.com](http://snapgene.com)).

## 218 **RESULTS**

219

220 The *S. Typhimurium* strain D23580 is a representative of the ST313 lineage 2 which is  
221 currently responsible for the epidemic of invasive non-typhoidal Salmonellosis in Africa  
222 (Kingsley et al., 2009). RNA-seq data from two previous studies (Canals et al., 2019;  
223 Hammarlöf et al., 2018) were used to interrogate the transcriptomes of the five  
224 prophages of *S. Typhimurium* D23580 (Owen et al., 2017). Further RNA-seq data for *S.*  
225 *Typhimurium* strain 4/74 from Kröger et al. allowed investigation of the conservation of  
226 prophage transcriptional landscapes in independent strain backgrounds (Kröger et al.,  
227 2013). Prophages Gifsy-2, ST64B and Gifsy-1 are present in both the 4/74 and D23580  
228 strains, unlike BTP1 and BTP5, which are exclusive to strain D23580.

229

230 Our published RNA-seq experiments generated transcriptomes of bacterial cell  
231 populations grown in 17 different *in vitro* conditions (Supplementary Table 1) designed  
232 to mimic the environments that *Salmonella* experiences during infection of a mammalian  
233 host (Canals et al., 2019; Kröger et al., 2013). A differential RNA-seq (dRNA-seq)  
234 approach was used to identify transcriptional start sites (TSS) (Sharma et al., 2010) for  
235 a subset of the *in vitro* conditions, and these were included in the analysis of the  
236 prophage transcriptomes. TSS data are particularly important for prophage regions, as  
237 they indicate the position and activity of promoters required to understand the regulatory  
238 architecture of the prophages.

239

240 We previously showed that, of the five prophages in *S. Typhimurium* D23580, only  
241 prophage BTP1 produced infectious viruses (Owen et al., 2017). Prophages Gifsy-2,  
242 ST64B and Gifsy-1 all contain mutations that either prevent prophage induction (Gifsy-  
243 1), or preclude assembly of infectious viruses (ST64B and Gifsy-2). Infectious BTP5  
244 viruses could not be detected, and therefore it is not known if the BTP5 prophage is  
245 functional. First, we used the RNA-seq data to reveal the transcriptional landscapes of  
246 these five distinct *Salmonella* prophages during lysogeny.

247

### 248 **Prophage transcriptional landscapes**

249

## 250 Prophage BTP1

251 The transcriptome map (Figure 1, Supplementary Figure 1) of BTP1 in a lysogenic state  
252 showed relatively little transcription, interspersed with a small number of highly  
253 transcribed regions. To quantitatively assess prophage gene expression, we used  
254 previously established transcript per million (TPM) expression values (Canals et al.,  
255 2019). Genes with TPM values  $\leq 10$  were considered not to be expressed. Five genes  
256 (excluding the two transfer RNA (tRNA) genes located in the centre of the prophage)  
257 showed particularly high expression (TPM  $>100$ ; Supplementary Table 4); *bstA*  
258 (STMMW\_03531, formerly known as *ST313-td*), *cl<sup>BTP1</sup>* (STMMW\_03541), *pid*  
259 (STMMW\_03751), *gtrC<sup>BTP1</sup>* (STMMW\_03911) and *gtrA<sup>BTP1</sup>* (STMMW\_03921). The  
260 *cl<sup>BTP1</sup>* and the *bstA* genes represent an operon transcribed from a single TSS, and  
261 RNA-seq reads mapped across the 88 bp intergenic region. The *cl<sup>BTP1</sup>-bstA* operon was  
262 highly expressed in most conditions, consistent with the  $CI^{BTP1}$  protein functioning as the  
263 prophage repressor. The *pid* gene, linked to maintenance of the pseudolysogenic state  
264 in phage P22 (Cenens et al., 2013b, 2013a) also showed a high level of transcription in  
265 the majority of conditions. Lastly, a two-gene operon encoding *gtrA<sup>BTP1</sup>* and *gtrC<sup>BTP1</sup>*  
266 showed high expression (TPM  $>100$ , Supplementary Figure 1). The *gtrA<sup>BTP1</sup>* gene  
267 encodes a putative bactoprenol-linked glucosyltranslocase (also known as ‘flippase’),  
268 and *gtrC<sup>BTP1</sup>* encodes a putative acetyltransferase that mediates the addition of an  
269 acetyl group to the rhamnose subunit of the O-antigen (Kintz et al., 2015). The *gtr*  
270 operon is commonly found in P22-like phages and modifies the O-antigen component of  
271 the lipopolysaccharide to inhibit superinfection of the lysogeny (Davies et al., 2013).

272

273 The structural (capsid and tail) and lysis genes (late lytic genes) showed low expression  
274 levels (TPM 10-20) in the majority of conditions tested. We previously showed that the  
275 BTP1 prophage exhibits an extremely high level of spontaneous induction (0.2%) within  
276 the cellular population (Owen et al., 2017). Because the transcriptome data generated  
277 by RNA-seq represents the average gene expression across an entire bacterial  
278 population, we propose that the apparent low-level expression of lytic genes (which are  
279 involved in cell lysis or components of the capsid and tail) reflects extremely high level



280 transcription of lytic genes within the fraction of the population in which the BTP1  
281 prophage is spontaneously induced. The prophage lytic genes appear to be transcribed  
282 in a large polycistronic operon that begins upstream of *STMMW\_03711*, directly after  
283 the two central tRNA genes. Operons may possess more than one promoter, producing  
284 transcripts of different lengths (Kröger et al., 2012). The BTP1 prophage capsid gene  
285 cluster contained four promoters on the coding strand. The BTP1 tail spike gene  
286 showed a different transcriptional pattern to the rest of the lytic gene operon and had  
287 several secondary promoters on both the coding and non-coding strand (Figure 1).

288  
289 Nine candidate noncoding RNAs (ncRNAs) were annotated in the transcriptome of  
290 BTP1 (Figure 1). One of these, designated *OOP<sup>BTP1</sup>*, occupies the same position as the  
291 *OOP* ncRNA of phage lambda, which is antisense to and overlapping the 3' end of the  
292 *cII* gene (Krinke and Wulff, 1987). In phage lambda, *OOP* is thought to regulate the  
293 expression of the *cII* gene, modulating the switch between lysogenic and lytic infection  
294 (Krinke et al., 1991). The remaining nine putative ncRNAs have not been identified in  
295 other lambdoid phages and prophages, and therefore their biological function is  
296 unknown. One of the identified ncRNAs, STnc6030, was notable due to its unusually  
297 large size (>700 nt), its position antisense to phage structural genes and its high-level of  
298 expression (average TPM = 90).

### 299 300 Prophage Gifsy-2

301 Unlike the BTP1 prophage transcriptome, which showed expression of the lytic genes in  
302 most conditions tested, the lytic genes of Gifsy-2 were not expressed (TPM ≤10) (Figure  
303 2). The highly expressed genes (TPM >100) of Gifsy-2 were restricted to known  
304 prophage accessory genes, such as the virulence-associated genes *sodCII*  
305 (*STMMW\_10551*), *gtgE* (*STMMW\_10681*) and *ssel* (*STMMW\_10631*). The *ssel* gene is  
306 a known pseudogene in strain D23580 generated by the insertion of a transposase  
307 (Carden et al., 2017). Sequence redundancy of the inserted transposase gene  
308 (*STMMW\_10641*) within the D23580 genome prevented the unique mapping of  
309 sequence reads, resulting in a blank region in the transcriptomic map (Figure 2).

310



311 Consistent with reports that Gifsy-2 is a lambda-like prophage (Lemire et al., 2011), the  
312 Gifsy-2 homolog of the lambda CI repressor, *STMMW\_10231*, was expressed (TPM  
313 >10) in all tested conditions. However, the induction behaviour of Gifsy prophages is  
314 distinct from lambda prophages. Gifsy prophages encode LexA-repressed antirepressor  
315 proteins, which, upon activation of the SOS response, inactivate the repressor protein  
316 (Lemire et al., 2011). This is opposed to the inactivation of the repressor protein by  
317 activated RecA protein in lambda prophages. We observed transcription of the Gifsy-2  
318 antirepressor gene, *gftA*, in most of our experimental conditions (Figure 2), suggesting  
319 that additional regulatory mechanisms may be involved in the induction in the Gifsy-2  
320 prophage.

321  
322 To examine the conservation of gene expression patterns between prophages in  
323 different host backgrounds, the level of transcription of Gifsy-2 genes in *S. Typhimurium*  
324 strain D23580 (belonging to sequence type 313) was compared to the level of  
325 transcription in sequence type (ST)19 strain 4/74 (Kröger et al., 2013) (Supplementary  
326 Figure 2). The most obvious difference between the expression patterns is that the  
327 Gifsy-2 ncRNA *IsrB-1* appeared to be expressed in strain 4/74 but not in D23580.  
328 However, previous investigation showed that *IsrB-1* is duplicated in the D23850 genome  
329 (being present on both Gifsy-2<sup>D23580</sup> and Gifsy-1<sup>D23580</sup> prophages) (Canals et al., 2019),  
330 meaning that *IsrB-1* RNA-seq reads could not be uniquely mapped to the D23580  
331 genome. Therefore, the absence of *IsrB-1* expression in D23580 is an artefact. Aside  
332 from this discrepancy, a remarkable consistency in the gene expression of the Gifsy-2  
333 prophage in strains D23580 and 4/74 was observed, showing that prophage gene  
334 expression landscapes are independent of host background and highly reproducible  
335 between two phylogenetically-distinct *Salmonella* strains.

336

### 337 Prophage ST64B

338 The ST64B prophage transcriptome (Figure 3) only showed significant lytic-gene  
339 transcription in two of the RNA-seq conditions tested: peroxide shock and nitric oxide  
340 shock. Because hydrogen peroxide and nitric oxide cause oxidative stress and DNA  
341 damage, transcription of the lytic genes in these conditions likely represents induction of

342 the defective ST64B prophage (the mutation in the tail assembly protein that inactivates  
343 function of the ST64B prophage is unlikely to prevent prophage induction). The lack of  
344 evidence for increased induction of the remaining D23580 prophages in these two  
345 conditions suggests that the ST64B prophage in D23580 is specifically sensitive to  
346 peroxide and nitric oxide stresses, which has not been previously observed.

347

348 ST64B contains an accessory gene that encodes the secreted effector protein SseK3.  
349 The *sseK3* gene was only expressed in conditions linked to infection inside mammalian  
350 macrophages, such as InSPI2 (a medium designed to mimic the intra-macrophage  
351 environment), peroxide shock, nitric oxide shock and the intra-macrophage  
352 environment. A similar expression profile was observed for genes that encode other  
353 SPI2-translocated effector proteins in *S. Typhimurium* strain 4/74 (Srikumar et al.,  
354 2015).

355

356 The patterns of gene expression of ST64B<sup>D23580</sup> and ST64B<sup>4/74</sup> showed many  
357 similarities (Supplementary Figure 3), though in 4/74 the prophage did not show lytic  
358 gene expression in the peroxide shock condition, suggesting that the prophage could  
359 exhibit distinct induction behaviour in strain 4/74. We speculate this difference could be  
360 explained by minor variations in the gene content between ST64B<sup>D23580</sup> and ST64B<sup>4/74</sup>  
361 (gene names displayed in red in Supplementary Figure 3 are unique to ST64B<sup>D23580</sup>).  
362 However, previous studies have shown that induction of ST64B does not produce  
363 infectious phage particles due to a frameshift mutation in the tail assembly gene  
364 (*STMMW\_19861-STMMW\_19871*) (Figuroa-Bossi and Bossi, 2004; Owen et al.,  
365 2017). Whilst the ST64B prophage in strain D23580 is not capable of forming infectious  
366 virions, induction of the prophage is still likely to result in cell lysis. This finding is  
367 relevant for other strains of *S. Typhimurium* which may harbour functional versions of  
368 the ST64B prophage.

369

### 370 Prophage Gifsy-1

371 Like the Gifsy-2<sup>D23580</sup> prophage, Gifsy-1<sup>D23580</sup> showed no evidence of lytic-gene  
372 transcription in any of the 17 environmental conditions examined (Figure 4). This is

373 consistent with the very low level of spontaneous induction that was observed for the  
374 resuscitated Gifsy-1 prophage in our previous study (Owen et al., 2017). Gifsy-1<sup>D23580</sup>  
375 expressed a number of ncRNAs which were highly transcribed in all conditions tested,  
376 including STnc1380, STnc2080, IsrJ, STnc1160 and IsrK (Padalon-Brauch et al., 2008).  
377 The virulence-associated genes *gogB* (*STMMW\_26001*), *steE* (*STMMW\_26011*,  
378 previously known as *pagJ* and *sarA*) and *pagK* (*STMMW\_26041*) were only expressed  
379 in intra-macrophage infection-related conditions. In contrast, the virulence-associated  
380 gene *gipA* (*STMMW\_26191*) was transcribed in all conditions tested, despite being  
381 previously reported to be specifically induced during colonisation of the small intestine  
382 (Stanley et al., 2000). Another virulence-associated gene, *gtgA* (*STMMW\_26331*)  
383 showed very little transcription in any of the conditions studied. The functionally  
384 uncharacterised gene *STMMW\_26411* was specifically induced in the anaerobic shock  
385 and anaerobic growth conditions, suggesting that this gene could play a role when the  
386 bacterium experiences absence of oxygen.

387  
388 The Gifsy-1 prophage is not identical between strains D23580 and 4/74 and shows  
389 considerable difference in gene content particularly at the 3' terminal end. Therefore,  
390 comparison of the Gifsy-1 gene expression profiles between the two strains is difficult to  
391 interpret (Supplementary Figure 4). However, the expression patterns of orthologous  
392 genes shared by the two prophages were similar across the conditions.

393

#### 394 Prophage BTP5

395 The BTP5 prophage showed the least transcriptional activity of all the D23580  
396 prophages (Figure 5, Supplementary Figure 5). However, the expression pattern of  
397 BTP5 genes does not provide insight into the biology of the prophage. The most highly  
398 expressed transcript in the prophage belonged to the *tum* gene (*STMMW\_32041*), a  
399 homolog of the Tum antirepressor of coliphage 186 (Shearwin et al., 1998). The  
400 antirepressor was expressed at high level particularly in the nitric oxide shock condition,  
401 raising the possibility that nitric oxide could stimulate induction of BTP5. We previously  
402 showed that infectious BTP5 phages could not be detected after induction with  
403 mitomycin C from strain D23580 (Owen et al., 2017) but the apparent activation of the

404 antirepressor in response to hydrogen peroxide stress could suggest that the BTP5  
405 prophage shows a specific induction behaviour.

406

407 Transcription was observed from the promoter upstream of the *apl* gene  
408 (*STMMW\_32112*) through to the uncharacterised gene *STMMW\_32601* in certain  
409 conditions, including early stationary phase (ESP), bile shock and anaerobic shock. The  
410 corresponding genes in coliphage 186 belong to the early lytic operon (Shearwin and  
411 Egan, 2000) and represent the genes initially expressed during lytic phage replication.  
412 Transcription of a three-gene operon consisting of tail structural genes  
413 (*STMMW\_31821*, *STMMW\_31811* and *STMMW\_31801*) was observed in a number of  
414 conditions and was particularly high in ESP, bile shock and nitric oxide shock. The tail  
415 structure of P2-like phages (Myoviruses) is complex (Christie and Calendar, 2016), and  
416 expression of these three genes alone would not produce functional phage tail particles.  
417 Therefore, the functional relevance of this transcript is unclear. Additionally, the *ogr*  
418 gene (*STMMW\_31741*), reported to be involved in control of late gene expression in  
419 phage P2 (Christie and Calendar, 2016), was expressed in all conditions tested.

420

421 Despite the transcription of a subset of lytic genes in the BTP5 prophage, the repressor  
422 and integrase genes were transcribed in all conditions examined, albeit at low levels  
423 relative to the level of tail gene transcription. We conclude that the BTP5 prophage  
424 transcriptome does not inform the functionality of the prophage, and, consistent with our  
425 previous study, the lysogeny and lysis behaviour of the BTP5 prophage remains  
426 enigmatic (Owen et al., 2017). We speculate that there may be further control of  
427 prophage BTP5 gene expression at the post-transcriptional level, or alternatively the  
428 transcriptome may reflect heterogeneity in the activity of the BTP5 prophage across the  
429 bacterial cell population.

430

### 431 **Characterised prophage accessory loci have unique transcriptional signatures**

432

433 *S. Typhimurium* prophages BTP1, Gifsy-2<sup>D23580</sup>, ST64B<sup>D23580</sup> and Gifsy-1<sup>D23580</sup> contain  
434 characterised accessory loci, including genes involved in *Salmonella* pathogenicity or

435 phage exclusion (Figure 6A). To empirically determine whether known prophage  
436 accessory loci had distinct transcriptional signatures compared with the rest of the  
437 prophage, we used an expression cut-off of 100 TPM (Canals et al., 2019) to identify  
438 highly expressed genes. Genes with expression values of >100 TPM in at least one  
439 RNA-seq experiment were classified as highly expressed during lysogeny  
440 (Supplementary Table 4). The highly expressed prophage genes were assigned to one  
441 of the following functional categories based on annotation: unknown function, accessory  
442 gene, regulatory gene, integrase, transposase or structural gene (Figure 6B). Of the 278  
443 genes annotated in the five prophages, 40 genes (14%) (Figure 6C) met our criteria of  
444 being highly expressed during lysogeny. As expected, a large number of the highly  
445 expressed category represented known accessory genes (11 genes), such as genes  
446 encoding type three secretion system (T3SS) effectors, or regulators (11 genes)  
447 including repressors. Among the other highly expressed genes were genes encoding  
448 two prophage integrases, one transposase, and one prophage structural protein.  
449 However, the largest category of highly expressed genes were of unknown function (14  
450 genes) (Hinton, 1997). We conclude that the transcriptional signatures are consistent  
451 with these 14 genes being novel prophage accessory genes or regulatory genes. We  
452 note that this 'guilt by association' approach has previously been successfully used to  
453 identify novel *Salmonella* pathogenicity island (SPI)-regulated genes (Kröger et al.,  
454 2013), and to make broader regulatory deductions (Perez-Sepulveda and Hinton, 2018;  
455 Thattai Mukund, 2013).

456

#### 457 **Identification of putative novel prophage regulatory or accessory loci**

458 Figure 7 shows the genomic and transcriptomic context of three of the prophage genes  
459 of unknown function identified in this study and likely to represent novel prophage  
460 regulatory or accessory loci. The *bstA* locus (Figure 7A) of prophage BTP1 is down-  
461 stream and co-transcribed with the *cI* repressor locus. The region between the  
462 repressor locus and the *n* locus of lambdoid prophages has been previously shown to  
463 have a high frequency of mosaicism and represents a common site of prophage  
464 accessory (moron) loci, such as the *rexAB* locus of phage lambda (Degnan et al.,  
465 2007). The *bstA* gene (*STMMW\_03531*, formerly designated *ST313-td*) has been

466 implicated as a determinant of both virulence (Herrero-Fresno et al., 2014) and anti-  
467 virulence (Herrero-Fresno et al., 2018) in *Salmonella enterica* strains, though no  
468 mechanism for these effects has been proposed (hence our conservative inclusion of  
469 *bstA* in the 'unknown function' functional category in this study. Our transcriptomic data  
470 support a functional role for *bstA* as a novel prophage accessory gene that deserves  
471 further study.

472  
473 Like *bstA*, the *STMMW\_20121* locus (Figure 7B) of prophage ST64B<sup>D23580</sup> showed  
474 transcription in almost all infection-relevant conditions included in our study. However,  
475 we observed that *STMMW\_20121* was independently transcribed and terminated from  
476 its own promoter and terminator. *STMMW\_20121* is encoded antisense to the prophage  
477 lytic genes, a region that is characteristic of prophage accessory (moron) loci (Cumby et  
478 al., 2012). The transcriptomic signature and genomic context of *STMMW\_20121* is  
479 consistent with the gene product having an accessory or regulatory function.

480  
481 Finally, we identified the *STMMW\_26411* locus (Figure 7C) of prophage Gifsy-1<sup>D23580</sup> as  
482 likely to be a novel prophage accessory gene. Unlike *bstA* and *STMMW\_20121*,  
483 *STMMW\_26411* showed highly condition-specific transcription, associated with  
484 anaerobic conditions. The environmental specificity of *STMMW\_26411* transcription  
485 leads us to speculate that the gene is more likely to be a novel accessory gene than  
486 function as a prophage regulatory gene, particularly given the lack of corresponding lytic  
487 gene transcription in the Gifsy-1<sup>D23580</sup> prophage under anaerobic conditions. This  
488 observation could be associated with the facultative anaerobic lifestyle of *S.*  
489 *Typhimurium* and the ability of the pathogen to colonise the mammalian gastrointestinal  
490 tract (Álvarez-Ordóñez et al., 2011). Furthermore, given the broad conservation of the  
491 Gifsy-1 prophage amongst *S. Typhimurium* strains (Mottawea et al., 2018) and known  
492 association of this prophage with virulence factors (Figure 6A), the *STMMW\_26411*  
493 locus represents an exciting candidate accessory factor for further study.

494  
495 **Identification of a novel prophage-encoded ncRNA involved in superinfection**  
496 **exclusion**



497 As well as identifying novel candidate prophage accessory and regulatory genes, our  
498 transcriptomic analysis of the prophages of D23580 identified a number of putative  
499 novel ncRNAs. We focused on the ncRNAs of prophage BTP1 (Figure 1), as this  
500 prophage is functional (Owen et al., 2017), yet poorly characterised. To identify the  
501 biological relevance of novel ncRNAs, STnc6030 was selected for further investigation  
502 as it was particularly highly expressed in the majority of infection-relevant growth  
503 conditions (Figure 8A). Additionally, the putative ncRNA is unusually long, >700  
504 nucleotides (nt) in length, and is positioned antisense to the BTP1 tailspike gene  
505 (*STMMW\_03901*) and a gene encoding a putative DNA injection protein  
506 (*STMMW\_03891*). It should be noted that the STnc6030 region is an area of unusually  
507 high transcription, with 10 TSS (sense and antisense) defined within the tailspike gene  
508 alone. Due to the length and antisense location of the STnc6030 transcript, the putative  
509 ncRNA was hypothesised to be an asRNA species. The majority of asRNAs that have  
510 been identified in bacteria function as inhibitors of target RNA function (Wagner et al.,  
511 2002), and are commonly found in accessory genome elements such as phages and  
512 plasmids (Thomason and Storz, 2010). We hypothesised that STnc6030 interacts with  
513 the transcription of the BTP1 tailspike gene, and investigated this experimentally. Figure  
514 8A shows a detailed view of STnc6030 transcription within the BTP1 transcriptome.  
515 Analysis of the STnc6030 transcript region in all three reading frames did not reveal any  
516 open reading frames >60 amino acids in length, supporting the classification of  
517 STnc6030 as an ncRNA species. The beginning of the STnc6030 transcript  
518 corresponds to the beginning of RNA-seq reads mapping to the tailspike gene on the  
519 sense strand, consistent with antisense interference with the tailspike gene transcript.

520  
521 The putative STnc6030 transcript that was identified from the BTP1 transcriptomic data  
522 was cloned into the pP<sub>L</sub> expression plasmid under the control of the constitutive P<sub>LlacO-1</sub>  
523 promoter. To confirm the presence of the STnc6030 transcript, an anti-STnc6030  
524 riboprobe was synthesised to detect the STnc6030 RNA species by Northern blot  
525 (Figure 8B). The riboprobe was designed to cover the totality of the approximately 786  
526 nt STnc6030 transcript, allowing the detection of any transcripts corresponding to this  
527 region. The anti-STnc6030 riboprobe detected a number of transcripts in the D23580

528 wild-type (WT) strain, whilst no transcripts were detected in the D23580  $\Delta$ BTP1 mutant,  
529 confirming that the detected bands did not reflect non-specific binding. The largest  
530 transcript detected by the anti-STnc6030 probe in the D23580 WT was approximately  
531 500 nt in length, significantly shorter than the putative length identified from the  
532 transcriptomic data (786 nt). At least two other smaller transcripts were detected, of  
533 ~500 nt and ~480 nt in length which could result from RNA processing or degradation  
534 product, as seen for other *Salmonella* ncRNAs such as ArcZ (Papenfort et al., 2009).

535  
536 To interrogate the biological function of STnc6030, D23580 WT and D23580  $\Delta$ BTP1  
537 (sensitive to phage BTP1) were transformed with the pP<sub>L</sub>-STnc6030 and empty vector  
538 control plasmids. The BTP1 prophage displays an unusually high level of spontaneous  
539 induction in the lysogeny cell population (Owen et al., 2017) and we hypothesised that  
540 STnc6030 may contribute to this phenotype. However, over-expression of STnc6030  
541 RNA did not affect the level of BTP1 spontaneous induction in the D23580 WT  
542 background, with no difference in the number of spontaneously induced BTP1 phage in  
543 overnight culture supernatants of D23580 WT, D23580 pP<sub>L</sub>-STnc6030 and D23580 pP<sub>L</sub>  
544 (empty vector) (Figure 9A).

545  
546 Next, we investigated whether STnc6030 could play a role in phage immunity.  
547 Expression of STnc6030 in a naïve host in the absence of the BTP1 prophage (D23580  
548  $\Delta$ BTP1 pP<sub>L</sub>-STnc6030) mediated total immunity to BTP1 infection (Figure 9B), but did  
549 not modulate susceptibility to phage P22 infection. These results were consistent with a  
550 regulatory mechanism in which STnc6030 targeted the sense transcript of the BTP1  
551 DNA injection and tailspike genes for degradation by base pairing. RNA-RNA  
552 interactions require high nucleotide complementarity, and consistent with this model, the  
553 corresponding region of the P22 genome does not share similarity to BTP1 at the  
554 nucleotide level.

555  
556 To explore the functionality of the STnc6030 transcript, a high titre BTP1 phage stock  
557 was screened for the presence of naturally occurring mutants resistant to exclusion by  
558 STnc6030 (Figure 9C). The BTP1 phage stock was plated on lawns of D23580  $\Delta$ BTP1



559 containing the pP<sub>L</sub>-STnc6030 expression plasmid escape phages arose at a frequency  
560 of  $4 \times 10^{-8}$ , and had varying plaque sizes (Figure 9C). Five escape phages were isolated  
561 and purified, and a nested PCR strategy was used to amplify the STnc6030 transcript  
562 region of the escape phages. Sequencing of the STnc6030 region revealed that each  
563 escape phage contained a single nucleotide polymorphism (SNP) relative to the BTP1  
564 WT sequence (Figure 9C). A total of four unique SNPs were identified that conferred  
565 resistance to STnc6030-mediated exclusion. The four SNPs clustered within a 36 bp  
566 region corresponding to the 3' end of the STnc6030 transcript, antisense to the putative  
567 DNA injection gene *STMMW\_03891* (Figure 9C). These data implicate the 3' end of  
568 STnc6030 as a functionally active "seed" region of the RNA which interacts with the  
569 antisense target (*STMMW\_03891*). The 4 SNPs also cause non-synonymous amino  
570 acid substitutions to the *STMMW\_03891* protein (Figure 9C).

571  
572 Together, these results are consistent with a model where the STnc6030 asRNA acts  
573 as a superinfection exclusion factor, inhibiting re-infection of the BTP1 phage lysogen  
574 with 'self' phage, or preventing the infection of closely-related phages that share  
575 sequence identify to BTP1 in the STnc6030 region. However, the fact that the BTP1  
576 prophage induction can occur normally in the presence of the STnc6030 asRNA (Figure  
577 9A) suggests that the induced BTP1 prophage has a mechanism to escape the effects  
578 of its own superinfection exclusion RNA. Further work is required to confirm the  
579 biological activity of the STnc6030 asRNA of the BTP1 prophage. Our data illustrate the  
580 power of using transcriptomic data to uncover novel prophage biology. Indeed, ncRNA  
581 species are completely undetectable without combining prophage genome sequence  
582 data with corresponding transcriptomic data of the lysogen.

## 583 DISCUSSION

584

585 Prophage accessory loci are often responsible for lysogenic conversion of the bacterial  
586 host, such as genes encoding virulence factors or superinfection immunity factors  
587 (Casjens and Hendrix, 2015). A study in *Pseudomonas aeruginosa* showed that 12 out  
588 of 14 previously uncharacterised accessory (moron) loci affected diverse bacterial  
589 phenotypes including phage immunity, motility and biofilm formation (Tsao et al., 2018).  
590 However, prophage accessory genes are difficult to identify from DNA-sequence alone.  
591 Prophage accessory loci are likely to be associated with unique transcriptional  
592 signatures compared to phage lytic genes, because in order to affect the biology of the  
593 host cell, they must be expressed during lysogeny. Here, we show that transcriptomic  
594 data, pre-existing or purposefully generated, provide unique insights into the molecular  
595 biology of prophages, and we propose that transcriptional signatures should be used to  
596 reduce the challenge of identifying novel prophage regulatory and accessory genes.

597

598 Inferences from the transcriptomes of the D23580 prophage regions were generally  
599 consistent with our previous findings concerning the functionality of the prophages  
600 (Owen et al., 2017). BTP1, a prophage which exhibits an unusually high level of  
601 spontaneous induction, showed an unusually high level of transcriptional activity for a  
602 prophage region. Canonically, prophage genes are expected to be transcriptionally  
603 repressed during lysogeny, apart from those genes whose products maintain prophage  
604 lysogeny, such as the gene encoding the CI repressor in lambdoid prophages (Ptashne,  
605 2004) or genes with accessory functions that confer a fitness advantage to the lysogen.  
606 Unlike the four other prophage regions of D23580, low-level transcription of the BTP1  
607 structural genes was observed in almost all growth conditions tested. A lysogenic cell  
608 cannot constitutively express phage structural and lytic genes, because, once the  
609 prophage molecular switch has moved to lytic from lysogenic replication, the  
610 unavoidable consequence is cell death (Ptashne, 2004). Therefore, if the observed lytic  
611 gene expression occurred in the entire cellular population, a population collapse would  
612 ensue, as ultimately sufficient lysis proteins were accumulated to initiate cell lysis.  
613 However, the BTP1 prophage lysogen (D23580) exhibits normal growth dynamics that

614 are comparable to strains not lysogenised by the BTP1 prophage (Owen et al., 2017).  
615 We therefore speculate that lytic gene expression observed in the transcriptomic data  
616 reflects the unavoidable averaging of gene expression across a heterogeneous  
617 population which has very high lytic gene expression in the subset of the bacteria  
618 undergoing spontaneous BTP1 prophage induction.

619  
620 Consistent with this speculation, the remaining D23580 prophages (Gifsy-2<sup>D23580</sup>,  
621 ST64B<sup>D23580</sup>, Gifsy-1<sup>D23580</sup>, and BTP5) do not exhibit significant spontaneous induction  
622 levels (Owen et al., 2017) and show very little lytic gene expression in the majority of  
623 growth conditions (Figures 2, 3, 4 & 5). The only other D23580 prophage to show  
624 evidence of late gene transcription was ST64B<sup>D23580</sup> in two growth conditions (peroxide  
625 and nitric oxide stress) and could reflect specific induction behaviour of the ST64B<sup>D23580</sup>  
626 prophage. In light of this finding, we speculate that the absolute expression levels of  
627 prophage structural genes could be used *in silico* to quantify the fraction of the  
628 lysogenic population undergoing lytic prophage replication.

629  
630 As well as providing insight into the replication state of the D23580 prophages, the  
631 transcriptome maps also allow the identification of putative accessory regions, genes or  
632 transcripts, expressed during lysogenic replication, or represent novel genes involved in  
633 the regulation of lysogeny. Prophage accessory genes are of importance for bacterial  
634 pathogens, as they could represent 'smoking guns' that could be responsible for rapid  
635 changes in disease tropism. Prophages BTP1 and BTP5 are specific to the epidemic  
636 African sequence type of *S. Typhimurium* ST313, and therefore have not been well  
637 characterised. The transcriptome maps of prophages BTP1 and BTP5 showed several  
638 more regions of transcription than are theoretically necessary for a lambdoid prophage  
639 to maintain lysogeny (typically the *cI* repressor only) (Hendrix, 1983).

640  
641 A number of genes in the BTP1 prophage showed an expression pattern consistent with  
642 an accessory or regulatory function, including *bstA*, *pid*, *gtrA*<sup>BTP1</sup> and *gtrC*<sup>BTP1</sup>. Of these  
643 four genes, all except *bstA* have mechanistically described accessory functions.  
644 Prophages Gifsy-2, ST64B and Gifsy-1 are broadly conserved in many strains of *S.*

645 *enterica* (Mottawea et al., 2018) and encode numerous virulence genes including T3SS  
646 effector genes (Ehrbar and Hardt, 2005). Although the regulatory behaviour and  
647 accessory genes of these prophages have been well studied, we identified numerous  
648 novel candidate accessory and regulatory genes, demonstrating the power of our  
649 transcriptomic approach.

650

651 Whilst transcriptomics represents a useful tool for discovering coding gene functions, it  
652 is arguably an even more powerful approach for the discovery of non-coding genomic  
653 elements such as ncRNAs. A number of putative RNA transcripts in the BTP1 prophage  
654 which did not correspond to protein coding sequences had an expression pattern  
655 consistent with an accessory function, including eight putative novel ncRNAs (Canals et  
656 al., 2019). Several prophage-encoded ncRNAs have been implicated in bacterial  
657 virulence, for example, the Gifsy-1 prophage encoded *IsrJ*, a ~74 nt ncRNA required for  
658 efficient invasion of *Salmonella* into nonphagocytic cells and effector translocation by  
659 the SPI-1 T3SS (Padalon-Brauch et al., 2008). Prophage-encoded ncRNAs also  
660 mediate non-virulence accessory functions, including the *sas* asRNA of phage P22 that  
661 induces a translational switch between distinct peptides encoded by the *sieB* gene, and  
662 is critical to the function of the SieB superinfection exclusion system (Ranade and  
663 Poteete, 1993). Lastly, the phage  $\lambda$  ncRNA OOP inhibits CII protein synthesis thereby  
664 pushing the phage molecular decision towards lysis, rather than lysogeny (Krinke and  
665 Wulff, 1987).

666

667 Our transcriptomic approach identified the STnc6030 asRNA encoded within the BTP1  
668 prophage late genes. The transcript is located antisense to the 3' end of the putative  
669 DNA-injection gene *STMMW\_03891* and 5' end of the tailspike gene *STMMW\_03901*.  
670 Expression of STnc6030 in a heterologous host abolished susceptibility to infection by  
671 BTP1, but not the related phage P22. However, the spontaneously induced titre of  
672 BTP1 phage was not affected when the STnc6030 transcript was overexpressed,  
673 suggesting that the asRNA does not interfere with replication of spontaneously induced  
674 BTP1.

675

676 Bacterial asRNAs, also known as *cis*-encoded RNAs, are usually found antisense to  
677 annotated coding genes. The extensive genetic complementarity with the corresponding  
678 transcripts allows asRNAs to affect the stability of complementary mRNA transcripts by  
679 base-pair interactions (Gottesman and Storz, 2011). Because double-stranded RNA  
680 molecules are substrates for endoribonucleases, the effect of asRNA targeting is  
681 usually to increase the degradation of particular mRNA transcripts and so reduce levels  
682 of the gene product. Alternatively, base-pairing of two RNA species can block an RNase  
683 recognition site, leading to increased stability of the target mRNA (Thomason and Storz,  
684 2010). Our data are consistent with a model where the functional mechanism of the  
685 STnc6030 asRNA is a base-pairing interaction with the transcript containing the DNA-  
686 injection gene *STMMW\_03891*, decreasing the stability of the mRNA. As prophage  
687 genes are frequently expressed as polycistronic operons encoding many of the genes  
688 required by the replicating phage, the antisense targeting of a single prophage gene  
689 could destabilize a long transcript encoding the entirety of the prophage lysis and  
690 structural genes, effectively inhibiting prophage replication. However, it remains unclear  
691 how the asRNA, which is natively located within BTP1, avoids interference with the  
692 BTP1 prophage upon induction from lysogenic growth within the bacterial chromosome.  
693 The mechanism by which the induced BTP1 prophage escapes its own immunity  
694 asRNA remains to be discovered. The BTP1 prophage encodes two other systems for  
695 superinfection exclusion, the GtrAC<sup>BTP1</sup> system and the Ci<sup>BTP1</sup> repressor (Kintz et al.,  
696 2015), so the precise biological role of the STnc6030 asRNA in the context of these  
697 other systems requires further study.

698  
699 Overall, our work represents the first detailed report of the transcriptional landscapes of  
700 native bacterial prophages. A wealth of RNA-sequencing data exist for a number of  
701 poorly characterised bacterial pathogens in which virulence factors and prophage  
702 molecular regulation have not been characterised. As well as identifying novel  
703 candidate regulatory and accessory loci in *Salmonella* prophages, our work represents  
704 a 'proof of concept' study that shows that careful analysis of RNA-seq data mapped to  
705 prophage regions could reveal a vast array of novel putative prophage accessory loci.

706 Prophage transcriptomic maps represent a powerful window through which to view the  
707 molecular biology of temperate phages.

708 **AUTHORSHIP & CONTRIBUTIONS**

709 SVO and JCDH conceptualised the study. SVO, RC, DH and CK developed  
710 methodology, curated data, and contributed resources. SVO, RC and NW conducted  
711 investigation and formal analysis. RC, NW, DH, CK and JCDH provided supervision.  
712 SVO wrote the manuscript. All authors reviewed and edited the manuscript.

713

714 **FUNDING INFORMATION**

715 This work was supported by a Wellcome Trust Senior Investigator award (to JCDH)  
716 (Grant 106914/Z/15/Z). RC was supported by a EU Marie Curie International Incoming  
717 Fellowship (FP7-PEOPLE-2013-IIF, Project Reference 628450). DLH was supported by  
718 the Wenner-Gren Foundation, Sweden. NW was supported by an Early Postdoc  
719 Mobility Fellowship from the Swiss National Science Foundation (Project Reference  
720 P2LAP3\_158684).

721

722 **ACKNOWLEDGEMENTS**

723 We are grateful to present and former members of the Hinton laboratory and Heather  
724 Allison for helpful discussions. We thank Paul Loughnane for expert technical  
725 assistance, and Michael Baym for his patience.



726 **REFERENCES**

- 727 Álvarez-Ordóñez, A., Begley, M., Prieto, M., Messens, W., López, M., Bernardo, A., Hill,  
728 C., 2011. Salmonella spp. survival strategies within the host gastrointestinal tract.  
729 Microbiology (Reading, Engl.) 157, 3268–3281.  
730 <https://doi.org/10.1099/mic.0.050351-0>
- 731 Ashton, P.M., Owen, S.V., Kaindama, L., Rowe, W.P., Lane, C.R., Larkin, L., Nair, S.,  
732 Jenkins, C., de Pinna, E.M., Feasey, N.A., 2017. Public health surveillance in the  
733 UK revolutionises our understanding of the invasive Salmonella Typhimurium  
734 epidemic in Africa. Genome medicine 9, 92.
- 735 Barondess, J.J., Beckwith, J., 1995. *bor* gene of phage lambda, involved in serum  
736 resistance, encodes a widely conserved outer membrane lipoprotein. J. Bacteriol.  
737 177, 1247–1253. <https://doi.org/10.1128/jb.177.5.1247-1253.1995>
- 738 Brüssow, H., Canchaya, C., Hardt, W.-D., 2004. Phages and the Evolution of Bacterial  
739 Pathogens: from Genomic Rearrangements to Lysogenic Conversion. Microbiol  
740 Mol Biol Rev 68, 560–602. <https://doi.org/10.1128/MMBR.68.3.560-602.2004>
- 741 Bryksin, A.V., Matsumura, I., 2010. Overlap extension PCR cloning: a simple and  
742 reliable way to create recombinant plasmids. BioTechniques 48, 463–465.  
743 <https://doi.org/10.2144/000113418>
- 744 Canals, R., Hammarlöf, D.L., Kröger, C., Owen, S.V., Fong, W.Y., Lacharme-Lora, L.,  
745 Zhu, X., Wenner, N., Carden, S.E., Honeycutt, J., Monack, D.M., Kingsley, R.A.,  
746 Brownridge, P., Chaudhuri, R.R., Rowe, W.P.M., Predeus, A.V., Hokamp, K.,  
747 Gordon, M.A., Hinton, J.C.D., 2019. Adding function to the genome of African  
748 Salmonella Typhimurium ST313 strain D23580. PLOS Biology 17, e3000059.  
749 <https://doi.org/10.1371/journal.pbio.3000059>
- 750 Carden, S.E., Walker, G.T., Honeycutt, J., Lugo, K., Pham, T., Jacobson, A., Bouley, D.,  
751 Idoyaga, J., Tsolis, R.M., Monack, D., 2017. Pseudogenization of the Secreted  
752 Effector Gene *ssel* Confers Rapid Systemic Dissemination of *S. Typhimurium*  
753 ST313 within Migratory Dendritic Cells. Cell Host & Microbe 21, 182–194.  
754 <https://doi.org/10.1016/j.chom.2017.01.009>
- 755 Casjens, S.R., Hendrix, R.W., 2015. Bacteriophage lambda: Early pioneer and still  
756 relevant. Virology 479–480, 310–330. <https://doi.org/10.1016/j.virol.2015.02.010>
- 757 Cenens, W., Makumi, A., Mebrhatu, M.T., Lavigne, R., Aertsen, A., 2013a. Phage-host  
758 interactions during pseudolysogeny: Lessons from the *Pid/dgo* interaction.  
759 Bacteriophage 3, e25029. <https://doi.org/10.4161/bact.25029>
- 760 Cenens, W., Mebrhatu, M.T., Makumi, A., Ceysens, P.-J., Lavigne, R., Van Houdt, R.,  
761 Taddei, F., Aertsen, A., 2013b. Expression of a novel P22 ORFan gene reveals  
762 the phage carrier state in Salmonella typhimurium. PLoS Genet. 9, e1003269.  
763 <https://doi.org/10.1371/journal.pgen.1003269>
- 764 Chen, Y., Golding, I., Sawai, S., Guo, L., Cox, E.C., 2005. Population Fitness and the  
765 Regulation of Escherichia coli Genes by Bacterial Viruses. PLOS Biology 3,  
766 e229. <https://doi.org/10.1371/journal.pbio.0030229>
- 767 Christie, G.E., Calendar, R., 2016. Bacteriophage P2. Bacteriophage 6.  
768 <https://doi.org/10.1080/21597081.2016.1145782>
- 769 Cumby, N., Davidson, A.R., Maxwell, K.L., 2012. The moron comes of age.  
770 Bacteriophage 2, e23146. <https://doi.org/10.4161/bact.23146>



- 771 Davies, M.R., Broadbent, S.E., Harris, S.R., Thomson, N.R., van der Woude, M.W.,  
772 2013. Horizontally Acquired Glycosyltransferase Operons Drive Salmonellae  
773 Lipopolysaccharide Diversity. *PLoS Genet* 9.  
774 <https://doi.org/10.1371/journal.pgen.1003568>
- 775 Degnan, P.H., Michalowski, C.B., Babić, A.C., Cordes, M.H.J., Little, J.W., 2007.  
776 Conservation and diversity in the immunity regions of wild phages with the  
777 immunity specificity of phage lambda. *Mol. Microbiol.* 64, 232–244.  
778 <https://doi.org/10.1111/j.1365-2958.2007.05650.x>
- 779 Ehrbar, K., Hardt, W.-D., 2005. Bacteriophage-encoded type III effectors in *Salmonella*  
780 enterica subspecies 1 serovar Typhimurium. *Infect. Genet. Evol.* 5, 1–9.  
781 <https://doi.org/10.1016/j.meegid.2004.07.004>
- 782 Figueroa-Bossi, N., Bossi, L., 2004. Resuscitation of a Defective Prophage in  
783 *Salmonella* Cocultures. *Journal of Bacteriology* 186, 4038–4041.  
784 <https://doi.org/10.1128/JB.186.12.4038-4041.2004>
- 785 Figueroa-Bossi, N., Bossi, L., 1999. Inducible prophages contribute to *Salmonella*  
786 virulence in mice. *Mol. Microbiol.* 33, 167–176.
- 787 Fortier, L.-C., Sekulovic, O., 2013. Importance of prophages to evolution and virulence  
788 of bacterial pathogens. *Virulence* 4, 354–365. <https://doi.org/10.4161/viru.24498>
- 789 Gottesman, S., Storz, G., 2011. Bacterial small RNA regulators: versatile roles and  
790 rapidly evolving variations. *Cold Spring Harb Perspect Biol* 3.  
791 <https://doi.org/10.1101/cshperspect.a003798>
- 792 Green, R., Rogers, E.J., 2013. Transformation of chemically competent *E. coli*. *Meth.*  
793 *Enzymol.* 529, 329–336. <https://doi.org/10.1016/B978-0-12-418687-3.00028-8>
- 794 Hammarlöf, D.L., Kröger, C., Owen, S.V., Canals, R., Lacharme-Lora, L., Wenner, N.,  
795 Schager, A.E., Wells, T.J., Henderson, I.R., Wigley, P., 2018. Role of a single  
796 noncoding nucleotide in the evolution of an epidemic African clade of *Salmonella*.  
797 *Proceedings of the National Academy of Sciences* 201714718.
- 798 Hendrix, R.W. (Ed.), 1983. *Lambda II*, Cold Spring Harbor monograph series. Cold  
799 Spring Harbor Laboratory, Cold Spring Harbor, N.Y.
- 800 Herrero-Fresno, A., Espinel, I.C., Spiegelhauer, M.R., Guerra, P.R., Andersen, K.W.,  
801 Olsen, J.E., 2018. The Homolog of the Gene *bstA* of the BTP1 Phage from  
802 *Salmonella enterica* Serovar Typhimurium ST313 Is an Antivirulence Gene in  
803 *Salmonella enterica* Serovar Dublin. *Infect. Immun.* 86.  
804 <https://doi.org/10.1128/IAI.00784-17>
- 805 Herrero-Fresno, A., Wallrodt, I., Leekitcharoenphon, P., Olsen, J.E., Aarestrup, F.M.,  
806 Hendriksen, R.S., 2014. The Role of the *st313-td* Gene in Virulence of  
807 *Salmonella* Typhimurium ST313. *PLoS One* 9.  
808 <https://doi.org/10.1371/journal.pone.0084566>
- 809 Hinton, J.C., 1997. The *Escherichia coli* genome sequence: the end of an era or the  
810 start of the FUN? *Mol. Microbiol.* 26, 417–422. <https://doi.org/10.1046/j.1365-2958.1997.6371988.x>
- 811
- 812 Juhala, R.J., Ford, M.E., Duda, R.L., Youlton, A., Hatfull, G.F., Hendrix, R.W., 2000.  
813 Genomic sequences of bacteriophages HK97 and HK022: pervasive genetic  
814 mosaicism in the lambdoid bacteriophages. *J. Mol. Biol.* 299, 27–51.  
815 <https://doi.org/10.1006/jmbi.2000.3729>

- 816 Kingsley, R.A., Msefula, C.L., Thomson, N.R., Kariuki, S., Holt, K.E., Gordon, M.A.,  
817 Harris, D., Clarke, L., Whitehead, S., Sangal, V., Marsh, K., Achtman, M.,  
818 Molyneux, M.E., Cormican, M., Parkhill, J., MacLennan, C.A., Heyderman, R.S.,  
819 Dougan, G., 2009. Epidemic multiple drug resistant *Salmonella* Typhimurium  
820 causing invasive disease in sub-Saharan Africa have a distinct genotype.  
821 *Genome Res* 19, 2279–2287. <https://doi.org/10.1101/gr.091017.109>
- 822 Kintz, E., Davies, M.R., Hammarlöf, D.L., Canals, R., Hinton, J.C.D., van der Woude,  
823 M.W., 2015. A BTP1 prophage gene present in invasive non-typhoidal  
824 *Salmonella* determines composition and length of the O-antigen of the  
825 lipopolysaccharide. *Mol. Microbiol.* 96, 263–275.  
826 <https://doi.org/10.1111/mmi.12933>
- 827 Krinke, L., Mahoney, M., Wulff, D.L., 1991. The role of the OOP antisense RNA in  
828 coliphage lambda development. *Mol. Microbiol.* 5, 1265–1272.  
829 <https://doi.org/10.1111/j.1365-2958.1991.tb01900.x>
- 830 Krinke, L., Wulff, D.L., 1987. OOP RNA, produced from multicopy plasmids, inhibits  
831 lambda cII gene expression through an RNase III-dependent mechanism. *Genes*  
832 *Dev.* 1, 1005–1013. <https://doi.org/10.1101/gad.1.9.1005>
- 833 Kröger, C., Colgan, A., Srikumar, S., Händler, K., Sivasankaran, S.K., Hammarlöf, D.L.,  
834 Canals, R., Grissom, J.E., Conway, T., Hokamp, K., Hinton, J.C.D., 2013. An  
835 infection-relevant transcriptomic compendium for *Salmonella enterica* Serovar  
836 Typhimurium. *Cell Host Microbe* 14, 683–695.  
837 <https://doi.org/10.1016/j.chom.2013.11.010>
- 838 Kröger, C., Dillon, S.C., Cameron, A.D.S., Papenfort, K., Sivasankaran, S.K., Hokamp,  
839 K., Chao, Y., Sittka, A., Hébrard, M., Händler, K., Colgan, A., Leekitcharoenphon,  
840 P., Langridge, G.C., Lohan, A.J., Loftus, B., Lucchini, S., Ussery, D.W., Dorman,  
841 C.J., Thomson, N.R., Vogel, J., Hinton, J.C.D., 2012. The transcriptional  
842 landscape and small RNAs of *Salmonella enterica* serovar Typhimurium. *Proc.*  
843 *Natl. Acad. Sci. U.S.A.* 109, E1277-1286.  
844 <https://doi.org/10.1073/pnas.1201061109>
- 845 Lemire, S., Figueroa-Bossi, N., Bossi, L., 2011. Bacteriophage crosstalk: coordination of  
846 prophage induction by trans-acting antirepressors. *PLoS Genet.* 7, e1002149.  
847 <https://doi.org/10.1371/journal.pgen.1002149>
- 848 Liu, X., Jiang, H., Gu, Z., Roberts, J.W., 2013. High-resolution view of bacteriophage  
849 lambda gene expression by ribosome profiling. *Proc. Natl. Acad. Sci. U.S.A.* 110,  
850 11928–11933. <https://doi.org/10.1073/pnas.1309739110>
- 851 Mottawea, W., Duceppe, M.-O., Dupras, A.A., Usongo, V., Jeukens, J., Freschi, L.,  
852 Emond-Rheault, J.-G., Hamel, J., Kukavica-Ibrulj, I., Boyle, B., Gill, A., Burnett,  
853 E., Franz, E., Arya, G., Weadge, J.T., Gruenheid, S., Wiedmann, M., Huang, H.,  
854 Daigle, F., Moineau, S., Bekal, S., Levesque, R.C., Goodridge, L.D., Ogunremi,  
855 D., 2018. *Salmonella enterica* Prophage Sequence Profiles Reflect Genome  
856 Diversity and Can Be Used for High Discrimination Subtyping. *Front Microbiol* 9.  
857 <https://doi.org/10.3389/fmicb.2018.00836>
- 858 Nicol, J.W., Helt, G.A., Blanchard, S.G., Raja, A., Loraine, A.E., 2009. The Integrated  
859 Genome Browser: free software for distribution and exploration of genome-scale  
860 datasets. *Bioinformatics* 25, 2730–2731.  
861 <https://doi.org/10.1093/bioinformatics/btp472>

- 862 Osterhout, R.E., Figueroa, I.A., Keasling, J.D., Arkin, A.P., 2007. Global analysis of host  
863 response to induction of a latent bacteriophage. *BMC Microbiol.* 7, 82.  
864 <https://doi.org/10.1186/1471-2180-7-82>
- 865 Owen, S.V., Perez-Sepulveda, B.M., Adriaenssens, E.M., 2018. Detection of  
866 Bacteriophages: Sequence-Based Systems, in: Harper, D.R., Abedon, S.T.,  
867 Burrowes, B.H., McConville, M.L. (Eds.), *Bacteriophages: Biology, Technology,*  
868 *Therapy.* Springer International Publishing, Cham, pp. 1–25.  
869 [https://doi.org/10.1007/978-3-319-40598-8\\_19-1](https://doi.org/10.1007/978-3-319-40598-8_19-1)
- 870 Owen, S.V., Wenner, N., Canals, R., Makumi, A., Hammarlöf, D.L., Gordon, M.A.,  
871 Aertsen, A., Feasey, N.A., Hinton, J.C., 2017. Characterization of the prophage  
872 repertoire of African *Salmonella Typhimurium* ST313 reveals high levels of  
873 spontaneous induction of novel phage BTP1. *Frontiers in microbiology* 8, 235.
- 874 Padalon-Brauch, G., Hershberg, R., Elgrably-Weiss, M., Baruch, K., Rosenshine, I.,  
875 Margalit, H., Altuvia, S., 2008. Small RNAs encoded within genetic islands of  
876 *Salmonella typhimurium* show host-induced expression and role in virulence.  
877 *Nucleic Acids Res.* 36, 1913–1927. <https://doi.org/10.1093/nar/gkn050>
- 878 Papenfort, K., Said, N., Welsink, T., Lucchini, S., Hinton, J.C.D., Vogel, J., 2009.  
879 Specific and pleiotropic patterns of mRNA regulation by ArcZ, a conserved, Hfq-  
880 dependent small RNA. *Mol. Microbiol.* 74, 139–158.  
881 <https://doi.org/10.1111/j.1365-2958.2009.06857.x>
- 882 Perez-Sepulveda, B.M., Hinton, J.C.D., 2018. Functional Transcriptomics for Bacterial  
883 Gene Detectives. *Microbiology Spectrum* 6.  
884 <https://doi.org/10.1128/microbiolspec.RWR-0033-2018>
- 885 Ptashne, M., 2004. A Genetic Switch: Phage Lambda Revisited, *A Genetic Switch:*  
886 *Phage Lambda Revisited.* Cold Spring Harbor Laboratory Press.
- 887 Ranade, K., Poteete, A.R., 1993. A switch in translation mediated by an antisense RNA.  
888 *Genes Dev.* 7, 1498–1507. <https://doi.org/10.1101/gad.7.8.1498>
- 889 Rist, M., Kertesz, M.A., 1998. Construction of improved plasmid vectors for promoter  
890 characterization in *Pseudomonas aeruginosa* and other gram-negative bacteria.  
891 *FEMS Microbiol. Lett.* 169, 179–183. <https://doi.org/10.1111/j.1574-6968.1998.tb13315.x>
- 893 Roux, S., Hallam, S.J., Woyke, T., Sullivan, M.B., 2015. Viral dark matter and virus-host  
894 interactions resolved from publicly available microbial genomes. *Elife* 4.  
895 <https://doi.org/10.7554/eLife.08490>
- 896 Sharma, C.M., Hoffmann, S., Darfeuille, F., Reignier, J., Findeiss, S., Sittka, A.,  
897 Chabas, S., Reiche, K., Hackermüller, J., Reinhardt, R., Stadler, P.F., Vogel, J.,  
898 2010. The primary transcriptome of the major human pathogen *Helicobacter*  
899 *pylori*. *Nature* 464, 250–255. <https://doi.org/10.1038/nature08756>
- 900 Shearwin, K.E., Brumby, A.M., Egan, J.B., 1998. The Tum protein of coliphage 186 is  
901 an antirepressor. *J. Biol. Chem.* 273, 5708–5715.  
902 <https://doi.org/10.1074/jbc.273.10.5708>
- 903 Shearwin, K.E., Egan, J.B., 2000. Establishment of lysogeny in bacteriophage 186.  
904 DNA binding and transcriptional activation by the CII protein. *J. Biol. Chem.* 275,  
905 29113–29122. <https://doi.org/10.1074/jbc.M004574200>

- 906 Sittka, A., Pfeiffer, V., Tedin, K., Vogel, J., 2007. The RNA chaperone Hfq is essential  
907 for the virulence of *Salmonella typhimurium*. *Mol. Microbiol.* 63, 193–217.  
908 <https://doi.org/10.1111/j.1365-2958.2006.05489.x>
- 909 Skinner, M.E., Uzilov, A.V., Stein, L.D., Mungall, C.J., Holmes, I.H., 2009. JBrowse: a  
910 next-generation genome browser. *Genome Res.* 19, 1630–1638.  
911 <https://doi.org/10.1101/gr.094607.109>
- 912 Srikumar, S., Kröger, C., Hébrard, M., Colgan, A., Owen, S.V., Sivasankaran, S.K.,  
913 Cameron, A.D., Hokamp, K., Hinton, J.C., 2015. RNA-seq brings new insights to  
914 the intra-macrophage transcriptome of *Salmonella Typhimurium*. *PLoS*  
915 *pathogens* 11, e1005262.
- 916 Thattai Mukund, 2013. Using topology to tame the complex biochemistry of genetic  
917 networks. *Philosophical Transactions of the Royal Society A: Mathematical,*  
918 *Physical and Engineering Sciences* 371, 20110548.  
919 <https://doi.org/10.1098/rsta.2011.0548>
- 920 Thomason, M.K., Storz, G., 2010. Bacterial antisense RNAs: how many are there, and  
921 what are they doing? *Annu. Rev. Genet.* 44, 167–188.  
922 <https://doi.org/10.1146/annurev-genet-102209-163523>
- 923 Touchon, M., Bernheim, A., Rocha, E.P., 2016. Genetic and life-history traits associated  
924 with the distribution of prophages in bacteria. *The ISME Journal* 10, 2744–2754.  
925 <https://doi.org/10.1038/ismej.2016.47>
- 926 Tsao, Y.-F., Taylor, V.L., Kala, S., Bondy-Denomy, J., Khan, A.N., Bona, D., Cattoir, V.,  
927 Lory, S., Davidson, A.R., Maxwell, K.L., 2018. Phage Morons Play an Important  
928 Role in *Pseudomonas aeruginosa* Phenotypes. *Journal of Bacteriology* 200,  
929 e00189-18. <https://doi.org/10.1128/JB.00189-18>
- 930 Veses-Garcia, M., Liu, X., Rigden, D.J., Kenny, J.G., McCarthy, A.J., Allison, H.E.,  
931 2015. Transcriptomic Analysis of Shiga-Toxigenic Bacteriophage Carriage  
932 Reveals a Profound Regulatory Effect on Acid Resistance in *Escherichia coli*.  
933 *Applied and Environmental Microbiology* 81, 8118–8125.  
934 <https://doi.org/10.1128/AEM.02034-15>
- 935 Vica Pacheco, S., García González, O., Paniagua Contreras, G.L., 1997. The lom gene  
936 of bacteriophage lambda is involved in *Escherichia coli* K12 adhesion to human  
937 buccal epithelial cells. *FEMS Microbiol. Lett.* 156, 129–132.  
938 <https://doi.org/10.1111/j.1574-6968.1997.tb12717.x>
- 939 Wagner, E.G.H., Altuvia, S., Romby, P., 2002. Antisense RNAs in bacteria and their  
940 genetic elements. *Adv. Genet.* 46, 361–398.
- 941 Wagner, G.P., Kin, K., Lynch, V.J., 2013. A model based criterion for gene expression  
942 calls using RNA-seq data. *Theory Biosci.* 132, 159–164.  
943 <https://doi.org/10.1007/s12064-013-0178-3>
- 944 Wagner, G.P., Kin, K., Lynch, V.J., 2012. Measurement of mRNA abundance using  
945 RNA-seq data: RPKM measure is inconsistent among samples. *Theory Biosci.*  
946 131, 281–285. <https://doi.org/10.1007/s12064-012-0162-3>
- 947 Wahl, A., Battesti, A., Ansaldi, M., 2019. Prophages in *Salmonella enterica*: a driving  
948 force in reshaping the genome and physiology of their bacterial host? *Molecular*  
949 *Microbiology* 111, 303–316. <https://doi.org/10.1111/mmi.14167>
- 950  
951



## 952 **Figure Legends**

953

954 Figure 1. The Transcriptomic landscape of the BTP1 prophage of *S. Typhimurium*  
955 D23580 across 22 different RNA-seq experiments. RNA-seq and dRNA-seq data from  
956 Canals et al. (2019) and Hammarlöf et al. (2018). Each coloured horizontal track  
957 represents a different RNA-seq condition (Supplementary Table 1), and upper panel  
958 shows sequence reads mapped to the positive strand and lower panel, negative strand.  
959 The dRNA-seq data are shown in red, and were used to identify the TSS, which are  
960 indicated by curved black arrows on the annotation track. Annotated phage genes are  
961 grouped into functional clusters.

962

963 Figure 2. The Transcriptomic landscape of the Gifsy-2 prophage of *S. Typhimurium*  
964 D23580 across 22 different RNA-seq experiments. RNA-seq and dRNA-seq data from  
965 Canals et al. (2019) and Hammarlöf et al. (2018). Each coloured horizontal track  
966 represents a different RNA-seq condition (Supplementary Table 1), and upper panel  
967 shows sequence reads mapped to the positive strand and lower panel, negative strand.  
968 The dRNA-seq data are shown in red, and were used to identify the TSS, which are  
969 indicated by curved black arrows on the annotation track. Annotated phage genes are  
970 grouped into functional clusters. Striped arrows indicate pseudogenes and dotted red  
971 lines indicate where open reading frames have been disrupted. Due to genomic  
972 redundancy some RNA-seq reads could not be mapped uniquely to the chromosome,  
973 these reads were ignored, and so transcriptomic signal is absent from parts of the  
974 prophage (e.g. the Gifsy-2 transposase *STMMW\_10641*).

975

976 Figure 3. The Transcriptomic landscape of the ST64B prophage of *S. Typhimurium*  
977 D23580 across 22 different RNA-seq experiments. RNA-seq and dRNA-seq data from  
978 Canals et al. (2019) and Hammarlöf et al. (2018). Each coloured horizontal track  
979 represents a different RNA-seq condition (Supplementary Table 1), and upper panel  
980 shows sequence reads mapped to the positive strand and lower panel, negative strand.  
981 The dRNA-seq data are shown in red, and were used to identify the TSS, which are  
982 indicated by curved black arrows on the annotation track. Annotated phage genes are  
983 grouped into functional clusters.

984

985 Figure 4. The Transcriptomic landscape of the Gifsy-1 prophage of *S. Typhimurium*  
986 D23580 across 22 different RNA-seq experiments. RNA-seq and dRNA-seq data from  
987 Canals et al. (2019) and Hammarlöf et al. (2018). Each coloured horizontal track  
988 represents a different RNA-seq condition (Supplementary Table 1), and upper panel  
989 shows sequence reads mapped to the positive strand and lower panel, negative strand.  
990 The dRNA-seq data are shown in red, and were used to identify the TSS, which are  
991 indicated by curved black arrows on the annotation track. Annotated phage genes are  
992 grouped into functional clusters.

993

994 Figure 5. The Transcriptomic landscape of the BTP5 prophage of *S. Typhimurium*  
995 D23580 across 22 different RNA-seq experiments. RNA-seq and dRNA-seq data from  
996 Canals et al. (2019) and Hammarlöf et al. (2018). Each coloured horizontal track  
997 represents a different RNA-seq condition (Supplementary Table 1), and upper panel

998 shows sequence reads mapped to the positive strand and lower panel, negative strand.  
999 The dRNA-seq data are shown in red, and were used to identify the TSS, which are  
1000 indicated by curved black arrows on the annotation track. Annotated phage genes are  
1001 grouped into functional clusters.

1002  
1003 Figure 6. Prophage regulatory or accessory genes show unique transcriptional  
1004 signatures. These findings suggest that transcriptomic data can be used to heuristically  
1005 enrich for genes likely to be associated with novel regulatory or accessory functions. A.  
1006 Genomic map of *S. Typhimurium* strain D23580 indicating the location of the five  
1007 prophage elements. Known accessory loci associated with each prophage element are  
1008 annotated in the exterior grey ring. B. Functional categorization of all prophage genes  
1009 with expression values of <100 TPM (not highly expressed in lysogeny) and >100 TPM  
1010 (highly expressed in lysogeny) in at least one RNA-seq condition. The majority of highly  
1011 expressed prophage genes have known regulatory or accessory function, or have no  
1012 known function. C. The 40 prophage genes of *S. Typhimurium* strain D23580 classified  
1013 as highly expressed during lysogeny.

1014  
1015 Figure 7. Examples of prophage genes exhibiting unique transcriptional signatures  
1016 consistent with regulatory or accessory functions. A the *bstA* locus of prophage BTP1.  
1017 B. The *STMMW\_20121* locus of prophage ST64B. C. The *STMMW\_26411* locus of  
1018 prophage Gifsy-1,

1019  
1020 Figure 8. Transcriptomics-based identification of a novel prophage-encoded asRNA,  
1021 STnc6030. A. The transcriptomic context of the STnc6030 ncRNA. The transcriptomic  
1022 data are the same as shown in Figure 1. B. Detection of the STnc6030 transcript by  
1023 northern blot using an anti-STnc6030 DIG-labelled riboprobe. The two most abundant  
1024 transcripts detected by the anti-STnc6030 riboprobe are indicated, with the approximate  
1025 size estimated from the molecular weight ladder.

1026  
1027 Figure 9. The BTP1-prophage encoded asRNA STnc6030 functions as a phage-specific  
1028 super-infection exclusion factor. A. Over-expression of the STnc6030 RNA in D23580  
1029 WT background does not affect BTP1 spontaneous induction. Plaque assay of  
1030 overnight culture supernatants of D23580 WT, D23580 p<sub>P<sub>L</sub></sub>-STnc6030 and D23580 p<sub>P<sub>L</sub></sub>  
1031 (empty vector) on host strain D23580 ΔBTP1. B. Heterologous expression of STnc6030  
1032 in D23580 ΔBTP1 completely protects against BTP1 phage, but not P22 infection.  
1033 Plaque assay of BTP1 and P22 phage on D23580 ΔBTP1 strains containing the p<sub>P<sub>L</sub></sub>-  
1034 STnc6030 expression plasmid or the negative control plasmid. C. Isolation of  
1035 STnc6030-escape mutants of phage BTP1 Suggest the STnc6030 functional 'seed'  
1036 region is located at the 3' end of the transcript. A high titer BTP1 phage stock was used  
1037 to identify naturally occurring BTP1 phage mutants that were immune to inhibition by  
1038 STnc6030. Escape phages were estimated to occur at a frequency of approximately  
1039 4x10<sup>-8</sup>. Five escape phages of varying plaque morphologies were selected for  
1040 sequencing. The sequence of the STnc6030 region of the escape phages identified  
1041 SNPs. The position and substitution are shown. The SNPs identified that conferred  
1042 immunity to STnc6030 interference were clustered within a 36bp region (shown)  
1043 corresponding to the 3' end of the STnc6030 transcript and the 3' end of the

1044 *STMMW\_03891* gene (located between nt 404040 and 404076 on the D23580  
1045 chromosome Accession: FN424405).

1046  
1047 Supplementary Figure 1. Heat map showing the absolute expression of BTP1 genes in  
1048 17 infection-relevant conditions. RNA-seq data from Canals et al., 2019 were used to  
1049 generate absolute expression values (transcript per million, TPM) for each coding gene  
1050 and annotated ncRNA of the BTP1 prophage.

1051  
1052 Supplementary Figure 2. Heat map showing the absolute expression of the Gifsy-2  
1053 prophage of D23580 and 4/74 strains in 17 infection-relevant conditions. RNA-seq data  
1054 from Canals et al., 2019 were used to generate absolute expression values (transcript  
1055 per million, TPM) for each coding gene and annotated ncRNA of the Gifsy-2 prophage.  
1056 Ortholog IDs in red text indicate genes unique to Gifsy-2<sup>D23580</sup> or Gifsy-2<sup>4/74</sup>.

1057  
1058 Supplementary Figure 3. Heat map showing the absolute expression of the ST64B  
1059 prophage of D23580 and 4/74 strains in 17 infection-relevant conditions. RNA-seq data  
1060 from Canals et al., 2019 were used to generate absolute expression values (transcript  
1061 per million, TPM) for each coding gene and annotated ncRNA of the ST64B prophage.  
1062 Ortholog IDs in red text indicate genes unique to ST64B<sup>D23580</sup> or ST64B<sup>4/74</sup>.

1063  
1064 Supplementary Figure 4. Heat map showing the absolute expression of the Gifsy-1  
1065 prophage of D23580 and 4/74 strains in 17 infection-relevant conditions. RNA-seq data  
1066 from Canals et al., 2019 were used to generate absolute expression values (transcript  
1067 per million, TPM) for each coding gene and annotated ncRNA of the Gifsy-1 prophage.  
1068 Ortholog IDs in red text indicate genes unique to Gifsy-1<sup>D23580</sup> or Gifsy-1<sup>4/74</sup>.

1069  
1070 Supplementary Figure 5. Heat map showing the absolute expression of BTP5 genes in  
1071 17 infection-relevant conditions. RNA-seq data from Canals et al., 2019 were used to  
1072 generate absolute expression values (transcript per million, TPM) for each coding gene  
1073 of the BTP5 prophage.

# BTP1

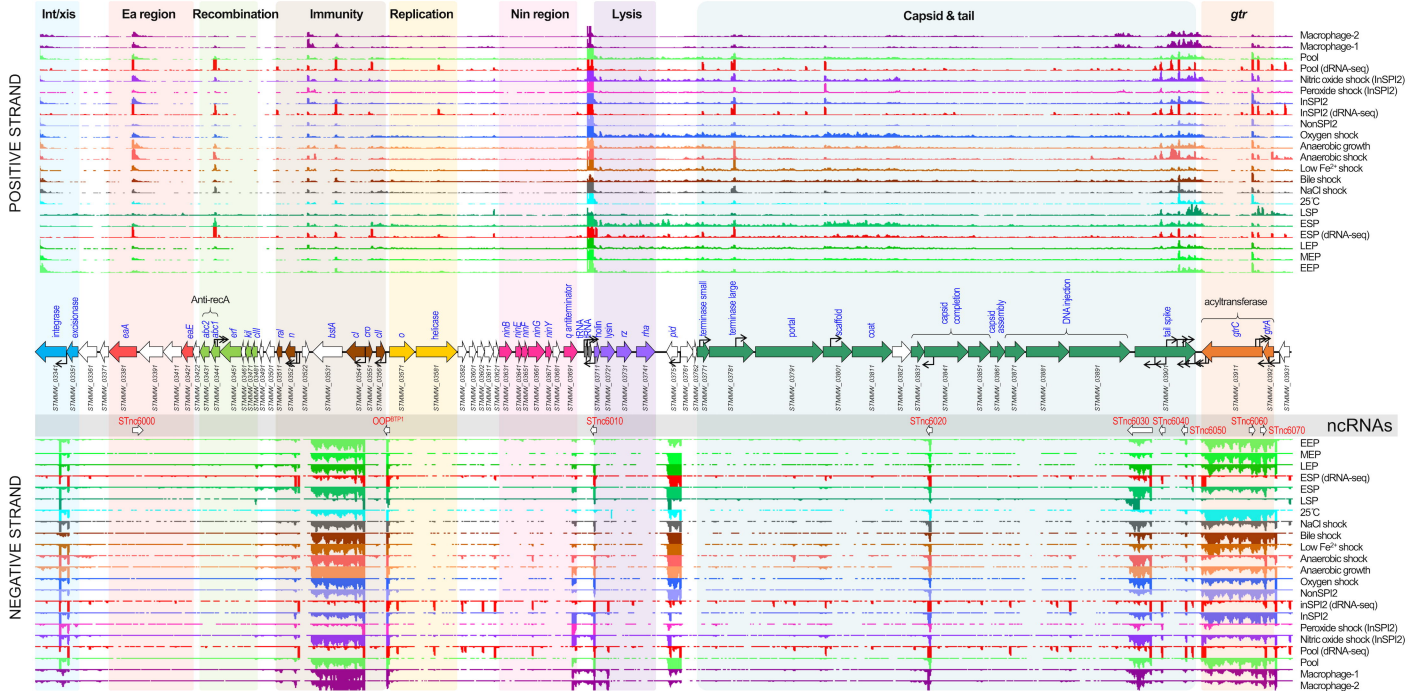











A

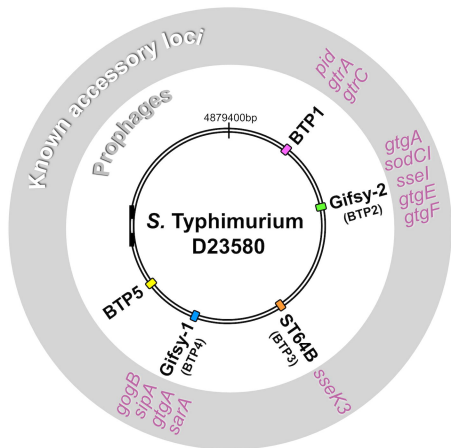

B

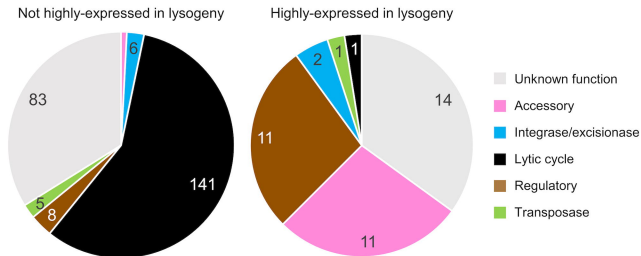

C

| Gene identifier | Common name / function    | Category    | Prophage |
|-----------------|---------------------------|-------------|----------|
| STMMW_03341     | <i>int</i>                | Integrase   | BTP1     |
| STMMW_03531     | <i>bstA</i>               | Accessory   |          |
| STMMW_03541     | <i>cl</i> repressor       | Regulatory  |          |
| STMMW_03751     | <i>pid</i>                | Accessory   |          |
| STMMW_03911     | <i>gtrC</i>               | Accessory   |          |
| STMMW_03921     | <i>gtrA</i>               | Accessory   | Gifsy-2  |
| STMMW_10161     | <i>int</i>                | Integrase   |          |
| STMMW_10231     | Repressor                 | Regulatory  |          |
| STMMW_10291     |                           | Unknown     |          |
| STMMW_10301     |                           | Unknown     |          |
| STMMW_10351     |                           | Unknown     | ST64B    |
| STMMW_10551     | <i>sodCa</i>              | Accessory   |          |
| STMMW_10631     | <i>ssel</i> (pseudogene)  | Accessory   |          |
| STMMW_10681     | <i>gtgE</i>               | Accessory   |          |
| STMMW_19812     | <i>sseK3</i>              | Accessory   |          |
| STMMW_19941     | tail tube protein         | Lytic cycle | Gifsy-1  |
| STMMW_20061     |                           | Unknown     |          |
| STMMW_20121     |                           | Unknown     |          |
| STMMW_20131     |                           | Unknown     |          |
| STMMW_20221     | <i>rha</i> regulator      | Regulatory  |          |
| STMMW_20231     | <i>cil</i>                | Regulatory  | BTP5     |
| STMMW_20232     | <i>cro</i>                | Regulatory  |          |
| STMMW_20241     | repressor                 | Regulatory  |          |
| STMMW_20251     |                           | Unknown     |          |
| STMMW_20261     |                           | Unknown     |          |
| STMMW_26001     | <i>gogB</i>               | Accessory   | Gifsy-1  |
| STMMW_26011     | <i>sarA</i>               | Accessory   |          |
| STMMW_26022     | transposase               | Transposase |          |
| STMMW_26041     | <i>pagK2</i>              | Accessory   |          |
| STMMW_26191     | <i>gipA</i>               | Accessory   |          |
| STMMW_26411     |                           | Unknown     | BTP5     |
| STMMW_26461     | <i>gfoR</i>               | Regulatory  |          |
| STMMW_26471     | Repressor                 | Regulatory  |          |
| STMMW_26481     |                           | Unknown     |          |
| STMMW_26491     |                           | Unknown     |          |
| STMMW_31741     | <i>ogr</i> (late control) | Regulatory  | BTP5     |
| STMMW_32031     | <i>orf97</i>              | Unknown     |          |
| STMMW_32041     | <i>tum</i>                | Regulatory  |          |
| STMMW_32091     |                           | Unknown     |          |
| STMMW_32112     | <i>apl</i>                | Regulatory  |          |

**A**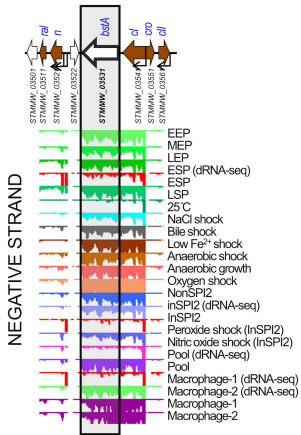**B**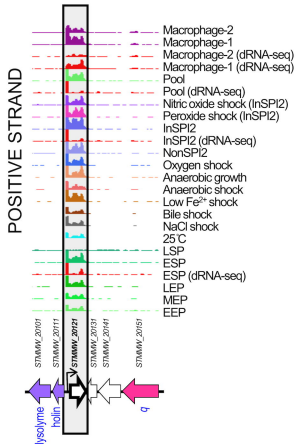**C**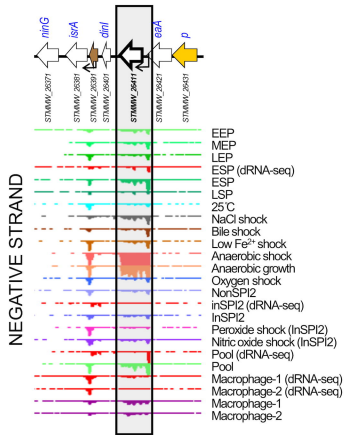

**A**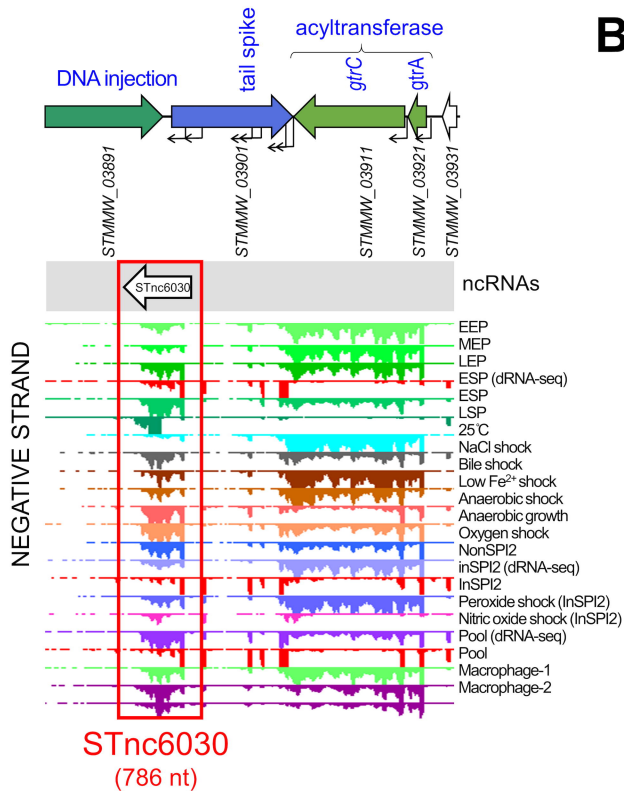**B**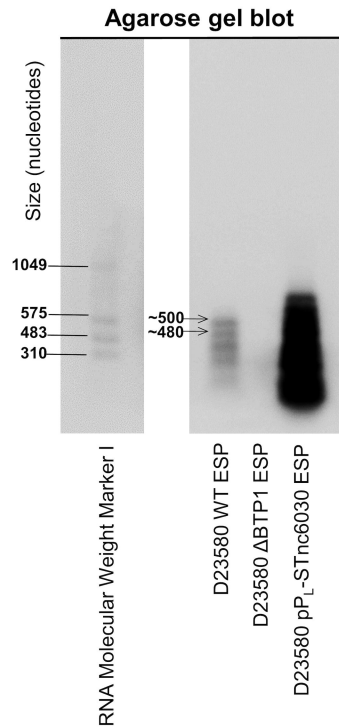



**A**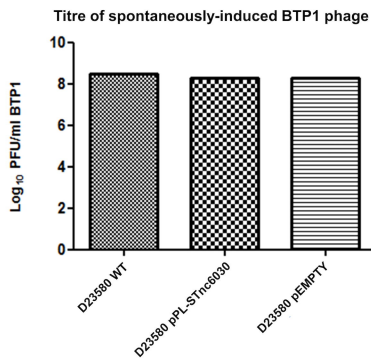**B**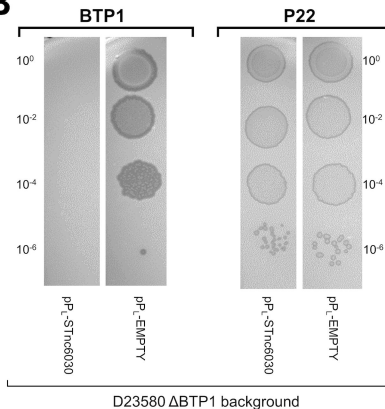**C**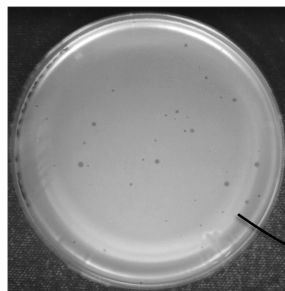

STnc6030 escape phages occur naturally at a frequency of  $4 \times 10^{-8}$

5 escape phages purified & STnc6030 region amplified and sequenced

D23580 ΔBTP1 pPL-STnc6030

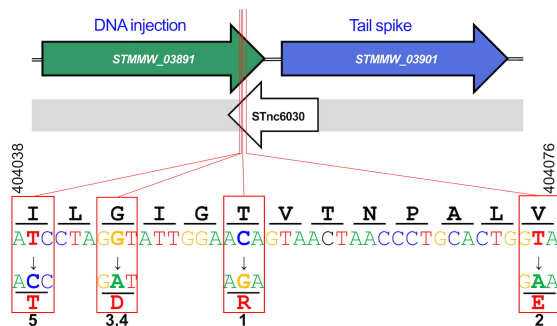

Source: https://www.biorxiv.org/content/10.1101/787010v1.full.pdf
